# Supplementary material for: Influence of biochar and nitrogen on fine root morphology, physiology, and chemistry of Acer mono
Source: PubMed Central journal article supplement (PMC5511266; doi:10.1038/s41598-017-05721-2), 2017-07-14
Supplement: 41598_2017_5721_MOESM1_ESM.pdf [file 41598_2017_5721_MOESM1_ESM.pdf]

## Supporting information

### Influence of biochar and nitrogen on fine root morphology, physiology, and chemistry of *Acer mono*

Muhammad Razaq<sup>1</sup>, Salahuddin<sup>1,2</sup>, Hai-long Shen<sup>1</sup>, Hassan Sher<sup>3</sup>, Peng Zhang<sup>1\*</sup>

Table S1. Root Length of first-fifth order roots after Biochar and Nitrogen combine addition. B stands for Biochar levels (B1-B4); N stands for Nitrogen levels (N1-N4). Different letter show the level of significance.  $\pm$  represent the standard error of the mean.

| Treatment | RL order 1 <sup>st</sup> | RL order 2 <sup>nd</sup> | RL order 3 <sup>rd</sup> | RL order 4 <sup>th</sup> | RL order 5 <sup>th</sup> |
|-----------|--------------------------|--------------------------|--------------------------|--------------------------|--------------------------|
| B1N1      | 78.3 $\pm$ 3.2g          | 50.0 $\pm$ 2.7e          | NS                       | NS                       | NS                       |
| B1N2      | 83.3 $\pm$ 3.0fg         | 60.3 $\pm$ 2d            | NS                       | NS                       | NS                       |
| B1N3      | 82.6 $\pm$ 4.9 f         | 65.0 $\pm$ 3.1c          | NS                       | NS                       | NS                       |
| B1N4      | 88.6 $\pm$ 5.5ef         | 67.6 $\pm$ 3.1bc         | NS                       | NS                       | NS                       |
| B2N1      | 87.0 $\pm$ 4.2ef         | 67.3 $\pm$ 3.1bc         | NS                       | NS                       | NS                       |
| B2N2      | 89.6 $\pm$ 4.4de         | 68.6 $\pm$ 3.7bc         | NS                       | NS                       | NS                       |
| B2N3      | 93.0 $\pm$ 4.2cd         | 68.3 $\pm$ 3.3bc         | NS                       | NS                       | NS                       |
| B2N4      | 97.0 $\pm$ 5.6bc         | 69.6 $\pm$ 3.6b          | NS                       | NS                       | NS                       |
| B3N1      | 93.0 $\pm$ 2.2cd         | 76.6 $\pm$ 3.9a          | NS                       | NS                       | NS                       |
| B3N2      | 97.0 $\pm$ 5bc           | 79.0 $\pm$ 3.9a          | NS                       | NS                       | NS                       |
| B3N3      | 95.6 $\pm$ 4.9bc         | 77.6 $\pm$ 2.3a          | NS                       | NS                       | NS                       |
| B3N4      | 93.0 $\pm$ 5.5cd         | 78.6 $\pm$ 3.9a          | NS                       | NS                       | NS                       |
| B4N1      | 98.3 $\pm$ 4.2a          | 76.6 $\pm$ 3.9a          | NS                       | NS                       | NS                       |
| B4N2      | 89.6 $\pm$ 5.4de         | 77.3 $\pm$ 4.1a          | NS                       | NS                       | NS                       |
| B4N3      | 96.6 $\pm$ 4.2bc         | 79.0 $\pm$ 4.1a          | NS                       | NS                       | NS                       |
| B4N4      | 102 $\pm$ 5.6a           | 80.3 $\pm$ 4.7a          | NS                       | NS                       | NS                       |

Table S2. Root diameter of first-fifth order roots after Biochar and Nitrogen combine addition. B stands for Biochar levels (B1-B4); N stands for Nitrogen levels (N1-N4). Different letter show the level of significance.  $\pm$  represent the standard error of the mean.

|      | RD order 1 <sup>st</sup> | RD order 2 <sup>nd</sup> | RD order 3 <sup>rd</sup> | RD order 4 <sup>th</sup> | RD order 5 <sup>th</sup> |
|------|--------------------------|--------------------------|--------------------------|--------------------------|--------------------------|
| B1N1 | 0.274 $\pm$ 0.01g        | 0.364 $\pm$ 0.02l        | 0.556 $\pm$ 0.02h        | NS                       | NS                       |
| B1N2 | 0.298 $\pm$ 0.01fg       | 0.386 $\pm$ 0.02kl       | 0.580 $\pm$ 0.02fgh      | NS                       | NS                       |
| B1N3 | 0.314 $\pm$ 0.02def      | 0.401 $\pm$ 0.02jk       | 0.577 $\pm$ 0.02efg      | NS                       | NS                       |
| B1N4 | 0.320 $\pm$ 0.01bcde     | 0.407 $\pm$ 0.03ijk      | 0.590 $\pm$ 0.04e        | NS                       | NS                       |
| B2N1 | 0.323 $\pm$ 0.02cde      | 0.403 $\pm$ 0.02fghi     | 0.565 $\pm$ 0.02ef       | NS                       | NS                       |
| B2N2 | 0.336 $\pm$ 0.01cde      | 0.405 $\pm$ 0.03hij      | 0.583 $\pm$ 0.02de       | NS                       | NS                       |
| B2N3 | 0.343 $\pm$ 0.04cde      | 0.408 $\pm$ 0.02hij      | 0.579 $\pm$ 0.02ef       | NS                       | NS                       |
| B2N4 | 0.343 $\pm$ 0.05cde      | 0.412 $\pm$ 0.04ghij     | 0.607 $\pm$ 0.03efgh     | NS                       | NS                       |
| B3N1 | 0.348 $\pm$ 0.04def      | 0.427 $\pm$ 0.03def      | 0.573 $\pm$ 0.02cd       | NS                       | NS                       |
| B3N2 | 0.351 $\pm$ 0.03bcd      | 0.428 $\pm$ 0.05cde      | 0.559 $\pm$ 0.03ef       | NS                       | NS                       |
| B3N3 | 0.352 $\pm$ 0.02bcd      | 0.424 $\pm$ 0.04defg     | 0.600 $\pm$ 0.03cd       | NS                       | NS                       |
| B3N4 | 0.352 $\pm$ 0.02bcd      | 0.433 $\pm$ 0.04bcd      | 0.619 $\pm$ 0.04bc       | NS                       | NS                       |
| B4N1 | 0.365 $\pm$ 0.04bcde     | 0.418 $\pm$ 0.04efgh     | 0.581 $\pm$ 0.03cd       | NS                       | NS                       |
| B4N2 | 0.366 $\pm$ 0.03bcd      | 0.439 $\pm$ 0.05bc       | 0.570 $\pm$ 0.04ef       | NS                       | NS                       |
| B4N3 | 0.382 $\pm$ 0.05ab       | 0.442 $\pm$ 0.07b        | 0.603 $\pm$ 0.06ab       | NS                       | NS                       |
| B4N4 | 0.395 $\pm$ 0.06a        | 0.456 $\pm$ 0.07a        | 0.626 $\pm$ 0.07a        | NS                       | NS                       |

Table S3. Specific root length (SRL) of first-fifth order roots after Biochar and Nitrogen combine addition. B stands for Biochar levels (B1-B4); N stands for Nitrogen levels (N1-N4). Different letter show the level of significance.  $\pm$  represent the standard error of the mean.

|      | SRL order 1 <sup>st</sup> | SRL order 2 <sup>nd</sup> | SRL order 3 <sup>rd</sup> | SRL order 4 <sup>th</sup> | SRL order 5 <sup>th</sup> |
|------|---------------------------|---------------------------|---------------------------|---------------------------|---------------------------|
| B1N1 | 81.6 $\pm$ 2g             | 54.3 $\pm$ 2e             | NS                        | NS                        | NS                        |
| B1N2 | 84.3 $\pm$ 3fg            | 60.3 $\pm$ 2d             | NS                        | NS                        | NS                        |
| B1N3 | 83.6 $\pm$ 2fg            | 64 $\pm$ 3cd              | NS                        | NS                        | NS                        |
| B1N4 | 89.6 $\pm$ 4de            | 66.6 $\pm$ 3bc            | NS                        | NS                        | NS                        |
| B2N1 | 88 $\pm$ 4ef              | 66.3 $\pm$ 3bc            | NS                        | NS                        | NS                        |
| B2N2 | 90.6 $\pm$ 4de            | 67.6 $\pm$ 3bc            | NS                        | NS                        | NS                        |
| B2N3 | 94 $\pm$ 5cd              | 67.3 $\pm$ 3bc            | NS                        | NS                        | NS                        |
| B2N4 | 98 $\pm$ 5bc              | 68.6 $\pm$ 3b             | NS                        | NS                        | NS                        |
| B3N1 | 94 $\pm$ 4cd              | 75.6 $\pm$ 4a             | NS                        | NS                        | NS                        |
| B3N2 | 98 $\pm$ 5bc              | 78 $\pm$ 4a               | NS                        | NS                        | NS                        |
| B3N3 | 96.6 $\pm$ 5bc            | 76.6 $\pm$ 4a             | NS                        | NS                        | NS                        |
| B3N4 | 94 $\pm$ 4cd              | 77.6 $\pm$ 4a             | NS                        | NS                        | NS                        |
| B4N1 | 99 $\pm$ 5b               | 75.6 $\pm$ 4a             | NS                        | NS                        | NS                        |
| B4N2 | 90.6 $\pm$ 5de            | 76.3 $\pm$ 4a             | NS                        | NS                        | NS                        |
| B4N3 | 97.6 $\pm$ 5bc            | 78 $\pm$ 4a               | NS                        | NS                        | NS                        |
| B4N4 | 104 $\pm$ 7a              | 79.3 $\pm$ 4a             | NS                        | NS                        | NS                        |

Table S4. Root tissue N concentration of first-fifth order roots after Biochar and Nitrogen combine addition. B stands for Biochar levels (B1-B4); N stands for Nitrogen levels (N1-N4). Different letter show the level of significance.  $\pm$  represent the standard error of the mean.

| Treatment | TNC order 1 <sup>st</sup> | TNC order 2 <sup>nd</sup> | TNC order 3 <sup>rd</sup> | TNC order 4 <sup>th</sup> | TNC order 5 <sup>th</sup> |
|-----------|---------------------------|---------------------------|---------------------------|---------------------------|---------------------------|
| B1N1      | 1.90 $\pm$ 0.1f           | 1.70 $\pm$ 0.1f           | 1.30 $\pm$ 0.05d          | 0.83 $\pm$ 0.03d          | 0.58 $\pm$ 0.03d          |
| B1N2      | 1.96 $\pm$ 0.3f           | 1.76 $\pm$ 0.2f           | 1.36 $\pm$ 0.05d          | 0.94 $\pm$ 0.03d          | 0.54 $\pm$ 0.02d          |
| B1N3      | 2.20 $\pm$ 0.2ef          | 2.04 $\pm$ 0.2ef          | 1.64 $\pm$ 0.05d          | 1.11 $\pm$ 0.03d          | 0.91 $\pm$ 0.03c          |
| B1N4      | 2.82 $\pm$ 0.3bcd         | 2.42 $\pm$ 0.3bcd         | 2.22 $\pm$ 0.05abc        | 1.19 $\pm$ 0.03abcd       | 1.00 $\pm$ 0.04bc         |
| B2N1      | 2.31 $\pm$ 0.4e           | 2.31 $\pm$ 0.3e           | 2.22 $\pm$ 0.05abc        | 1.05 $\pm$ 0.04d          | 0.75 $\pm$ 0.02d          |
| B2N2      | 2.79 $\pm$ 0.4bcd         | 2.59 $\pm$ 0.2bcd         | 2.19 $\pm$ 0.06abc        | 1.66 $\pm$ 0.04abc        | 1.36 $\pm$ 0.03abc        |
| B2N3      | 2.84 $\pm$ 0.4bcd         | 2.64 $\pm$ 0.3bcd         | 2.24 $\pm$ 0.06abc        | 1.71 $\pm$ 0.05abc        | 1.41 $\pm$ 0.04abc        |
| B2N4      | 2.87 $\pm$ 0.4bcd         | 2.67 $\pm$ 0.3abcd        | 2.27 $\pm$ 0.06abc        | 1.74 $\pm$ 0.05abc        | 1.44 $\pm$ 0.04abc        |
| B3N1      | 2.82 $\pm$ 0.4bcd         | 2.62 $\pm$ 0.2bcd         | 2.22 $\pm$ 0.06abc        | 1.69 $\pm$ 0.04abc        | 1.39 $\pm$ 0.04abc        |
| B3N2      | 2.96 $\pm$ 0.4bcd         | 2.76 $\pm$ 0.2abc         | 2.36 $\pm$ 0.06abc        | 1.83 $\pm$ 0.05abc        | 1.43 $\pm$ 0.05abc        |
| B3N3      | 2.77 $\pm$ 0.4cd          | 2.57 $\pm$ 0.3cd          | 2.17 $\pm$ 0.06abc        | 1.84 $\pm$ 0.05abc        | 1.44 $\pm$ 0.04abc        |
| B3N4      | 3.09 $\pm$ 0.5ab          | 2.79 $\pm$ 0.2ab          | 2.49 $\pm$ 0.06ab         | 1.86 $\pm$ 0.04abc        | 1.58 $\pm$ 0.05ab         |
| B4N1      | 2.63 $\pm$ 0.4a           | 2.83 $\pm$ 0.3d           | 2.03 $\pm$ 0.06c          | 1.77 $\pm$ 0.04abc        | 1.60 $\pm$ 0.05ab         |
| B4N2      | 3.04 $\pm$ 0.5abc         | 2.84 $\pm$ 0.3abc         | 2.44 $\pm$ 0.06ab         | 1.95 $\pm$ 0.04ab         | 1.66 $\pm$ 0.05a          |
| B4N3      | 3.15 $\pm$ 0.5a           | 2.95 $\pm$ 0.2a           | 2.55 $\pm$ 0.06a          | 2.01 $\pm$ 0.05a          | 1.68 $\pm$ 0.06a          |
| B4N4      | 3.16 $\pm$ 0.5a           | 2.96 $\pm$ 0.3a           | 2.56 $\pm$ 0.06a          | 2.02 $\pm$ 0.05a          | 1.71 $\pm$ 0.06a          |

Table S5. C: N ratio of first-fifth order roots after Biochar and Nitrogen combine addition. B stands for Biochar levels (B1-B4); N stands for Nitrogen levels (N1-N4). Different letter show the level of significance.  $\pm$  represent the standard error of the mean.

|      | N: C order 1 <sup>st</sup> | N: C order 2 <sup>nd</sup> | N: C order 3 <sup>rd</sup> | N: C order 4 <sup>th</sup> | N: C order 5 <sup>th</sup> |
|------|----------------------------|----------------------------|----------------------------|----------------------------|----------------------------|
| B1N1 | 16. $\pm$ 0.3h             | 21 $\pm$ 0.4h              | 22.6 $\pm$ 0.4h            | 28.7 $\pm$ 0.7h            | 30.8 $\pm$ 0.5g            |
| B1N2 | 17.5 $\pm$ 0.2ef           | 21.3 $\pm$ 0.4gh           | 23.8 $\pm$ 0.4g            | 29.9 $\pm$ 0.7g            | 32 $\pm$ 0.5f              |
| B1N3 | 19 $\pm$ 0.2de             | 21.7 $\pm$ 0.4fg           | 24.2 $\pm$ 0.5g            | 30.3 $\pm$ 0.7fg           | 32.3 $\pm$ 0.5ef           |
| B1N4 | 19 $\pm$ 0.2cd             | 22.6 $\pm$ 0.4de           | 24.4 $\pm$ 0.5fg           | 30.5 $\pm$ 0.7fg           | 32.6 $\pm$ 0.6ef           |
| B2N1 | 17.90 $\pm$ 0.2efg         | 22.3 $\pm$ 0.5de           | 24.5 $\pm$ 0.6fg           | 30.6 $\pm$ 0.7fg           | 32.7 $\pm$ 0.6ef           |
| B2N2 | 18.5 $\pm$ 0.2ef           | 22 $\pm$ 0.5ef             | 24.7 $\pm$ 0.7efg          | 30.8 $\pm$ 0.9efg          | 32.9 $\pm$ 0.6def          |
| B2N3 | 18.5 $\pm$ 0.3ef           | 22.6 $\pm$ 0.5de           | 24.7 $\pm$ 0.6efg          | 30.8 $\pm$ 0.9efg          | 32.9 $\pm$ 0.7def          |
| B2N4 | 19.9 $\pm$ 0.4c            | 22.4 $\pm$ 0.5de           | 24.7 $\pm$ 0.7efg          | 30.8 $\pm$ 0.9efg          | 32.9 $\pm$ 0.7def          |
| B3N1 | 17.6 $\pm$ 0.3gh           | 23.4 $\pm$ 0.5cd           | 25.3 $\pm$ 0.7def          | 31.4 $\pm$ 0.9def          | 33.4 $\pm$ 0.7cde          |
| B3N2 | 18.2 $\pm$ 0.3fg           | 23.6 $\pm$ 0.5cd           | 25.7 $\pm$ 0.7cde          | 31.8 $\pm$ 0.8cde          | 33.9 $\pm$ 0.7cd           |
| B3N3 | 19.7 $\pm$ 0.4cd           | 23.8 $\pm$ 0.6cd           | 26 $\pm$ 0.7bcd            | 32.1 $\pm$ 0.9bcd          | 34.2 $\pm$ 0.7bc           |
| B3N4 | 19.8 $\pm$ 0.3c            | 23.5 $\pm$ 0.5cd           | 26 $\pm$ 0.7bcd            | 32.1 $\pm$ 0.9bcd          | 34.2 $\pm$ 0.7bc           |
| B4N1 | 18.3 $\pm$ 0.4efg          | 24 $\pm$ 0.6bc             | 26.1 $\pm$ 0.7bcd          | 32.2 $\pm$ 0.8bcd          | 34.3 $\pm$ 0.7bc           |
| B4N2 | 20.7 $\pm$ 0.3b            | 24.3 $\pm$ 0.6bc           | 26.4 $\pm$ 0.9bc           | 32.5 $\pm$ 0.9bc           | 34.6 $\pm$ 0.9bc           |
| B4N3 | 20.2 $\pm$ 0.5bc           | 24.8 $\pm$ 0.6b            | 26.9 $\pm$ 0.9b            | 33 $\pm$ 0.9b              | 35.1 $\pm$ 0.9ab           |
| B4N4 | 21.7 $\pm$ 0.6a            | 25.8 $\pm$ 0.7a            | 27.9 $\pm$ 0.9a            | 34 $\pm$ 0.9a              | 35.9 $\pm$ 0.9a            |

Table S6. Root respiration of first-fifth order roots after Biochar and Nitrogen combine addition. B stands for Biochar levels (B1-B4); N stands for Nitrogen levels (N1-N4);

(Mean  $\pm$  standard error). Different letter show the level of significance.  $\pm$  represent the standard error of the mean.

| Treatment | Rep order 1 <sup>st</sup> | Rep order 2 <sup>nd</sup> | Rep order 3 <sup>rd</sup> | Rep order 4 <sup>th</sup> | Rep order 5 <sup>th</sup> |
|-----------|---------------------------|---------------------------|---------------------------|---------------------------|---------------------------|
| B1N1      | 15 $\pm$ 0.5g             | 13.2 $\pm$ 0.6f           | 9.3 $\pm$ 0.4f            | 4.3 $\pm$ 0.3f            | 2.4 $\pm$ 0.2g            |
| B1N2      | 18.4 $\pm$ 0.5f           | 16.4 $\pm$ 0.6e           | 12.4 $\pm$ 0.4e           | 7.4 $\pm$ 0.3e            | 5.5 $\pm$ 0.3f            |
| B1N3      | 18.5 $\pm$ 0.5f           | 16.5 $\pm$ 0.6e           | 12.5 $\pm$ 0.4e           | 7.5 $\pm$ 0.3e            | 5.5 $\pm$ 0.2f            |
| B1N4      | 19.4 $\pm$ 0.5ef          | 17.4 $\pm$ 0.6de          | 13.4 $\pm$ 0.3de          | 8.4 $\pm$ 0.4de           | 6.4 $\pm$ 0.2ef           |
| B2N1      | 19.6 $\pm$ 0.5ef          | 17.6 $\pm$ 0.6de          | 13.6 $\pm$ 0.4de          | 8.6 $\pm$ 0.4de           | 6.6 $\pm$ 0.3ef           |
| B2N2      | 19.6 $\pm$ 0.5def         | 17.6 $\pm$ 0.6de          | 13.6 $\pm$ 0.4de          | 8.6 $\pm$ 0.4de           | 6.6 $\pm$ 0.3ef           |
| B2N3      | 19.7 $\pm$ 0.5def         | 17.7 $\pm$ 0.7de          | 13.7 $\pm$ 0.3de          | 8.7 $\pm$ 0.4de           | 6.7 $\pm$ 0.2def          |
| B2N4      | 19.9 $\pm$ 0.5cdef        | 17.9 $\pm$ 0.7cde         | 13.9 $\pm$ 0.4cde         | 8.9 $\pm$ 0.4cde          | 6.9 $\pm$ 0.3cdef         |
| B3N1      | 20 $\pm$ 0.6cdef          | 18 $\pm$ 0.7cde           | 14 $\pm$ 0.4cde           | 9 $\pm$ 0.4cde            | 7 $\pm$ 0.3cdef           |
| B3N2      | 20.2 $\pm$ 0.6cdef        | 18.2 $\pm$ 0.7cde         | 14.2 $\pm$ 0.4cde         | 9.2 $\pm$ 0.4cde          | 7.2 $\pm$ 0.3cdef         |
| B3N3      | 20.9 $\pm$ 0.6bcde        | 18.9 $\pm$ 0.7bcd         | 14.9 $\pm$ 0.4bcd         | 9.9 $\pm$ 0.3bcd          | 7.9 $\pm$ 0.4bcde         |
| B3N4      | 20.9 $\pm$ 0.6bcde        | 18.9 $\pm$ 0.7bcd         | 14.9 $\pm$ 0.4bcd         | 9.9 $\pm$ 0.3bcd          | 7.9 $\pm$ 0.4bcde         |
| B4N1      | 21.6 $\pm$ 0.6bcd         | 19.6 $\pm$ 0.7bc          | 15.6 $\pm$ 0.4bc          | 10.6 $\pm$ 0.3bc          | 8.6 $\pm$ 0.4bcd          |
| B4N2      | 21.7 $\pm$ 0.6bc          | 19.7 $\pm$ 0.7bc          | 15.7 $\pm$ 0.5bc          | 10.7 $\pm$ 0.4bc          | 8.7 $\pm$ 0.4bc           |
| B4N3      | 22.3 $\pm$ 0.6b           | 20.3 $\pm$ 0.7b           | 16.3 $\pm$ 0.5b           | 11.3 $\pm$ 0.4b           | 9.3 $\pm$ 0.4b            |
| B4N4      | 24.6 $\pm$ 0.6a           | 20.6 $\pm$ 0.7a           | 18.6 $\pm$ 0.5a           | 13.3 $\pm$ 0.4a           | 11.6 $\pm$ 0.4a           |
